# Supplementary material for: THEMIS attenuates MASH by suppressing disease-associated hepatocyte induction and hepatocyte senescence in mice
Source: JCI journal article supplement (doi:10.1172/jci199303), 2026-05-01

Figure 1G

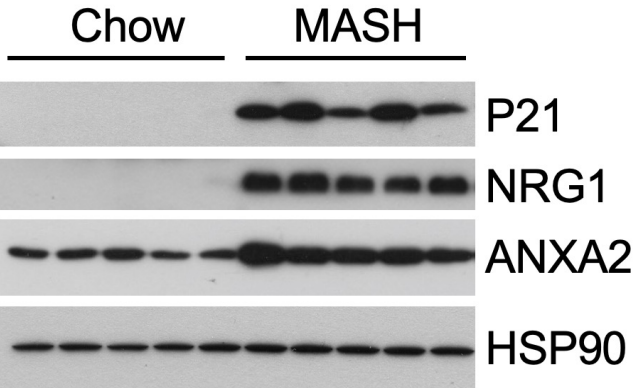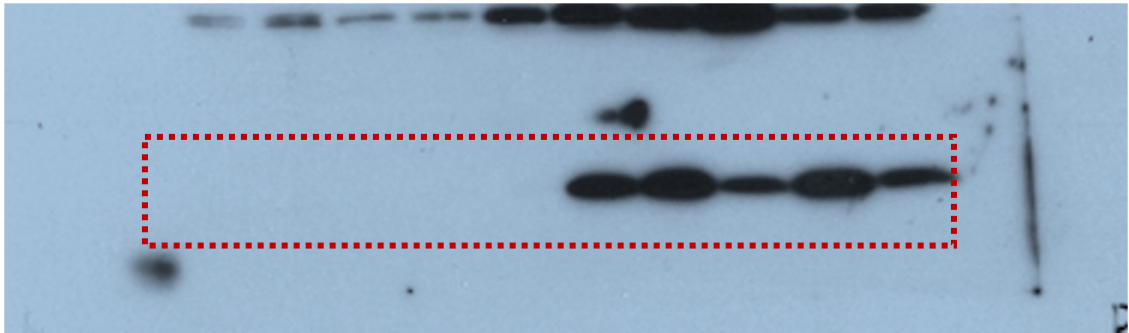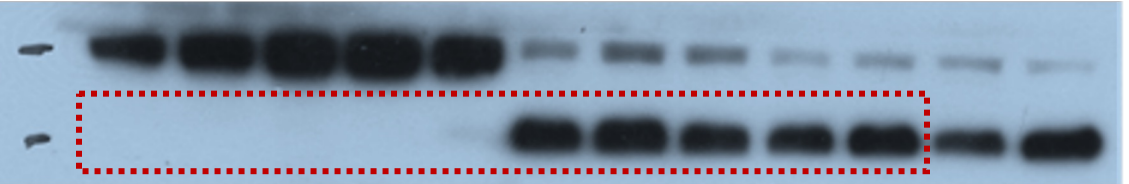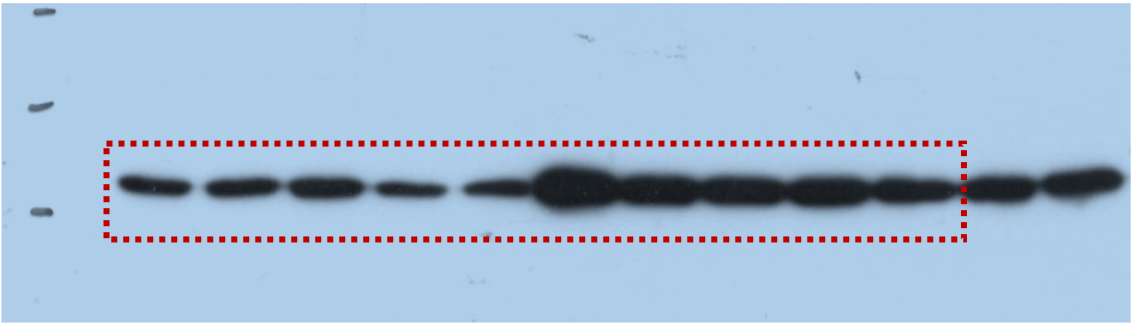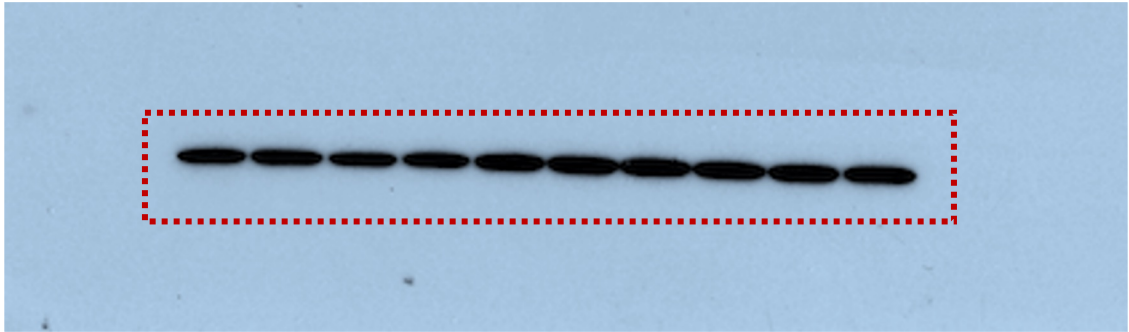

Figure 2D

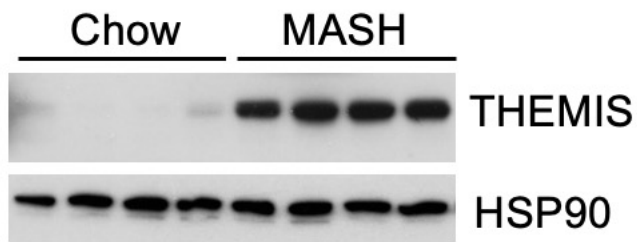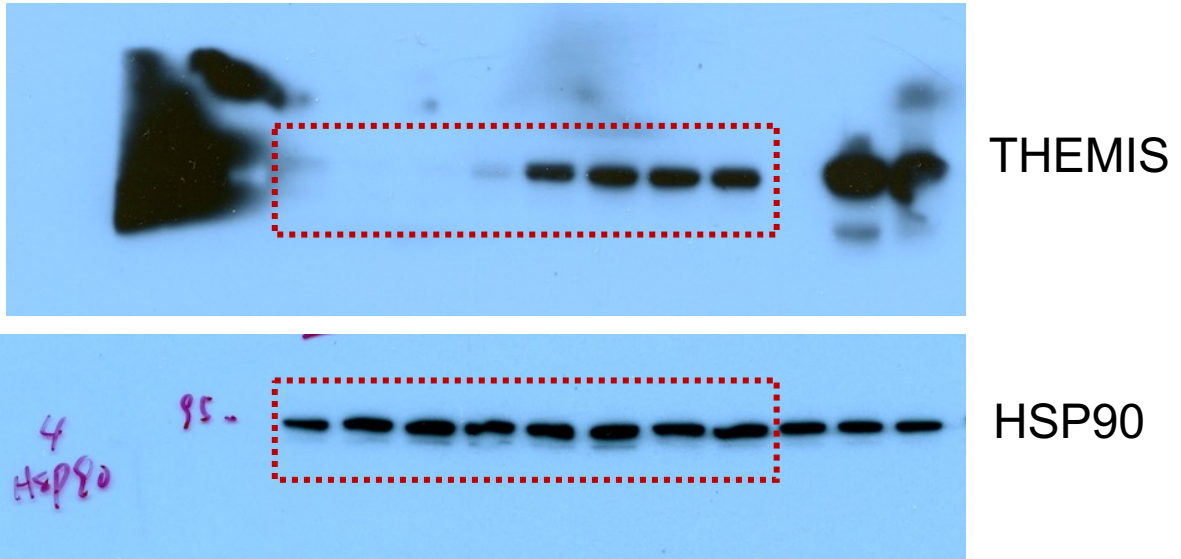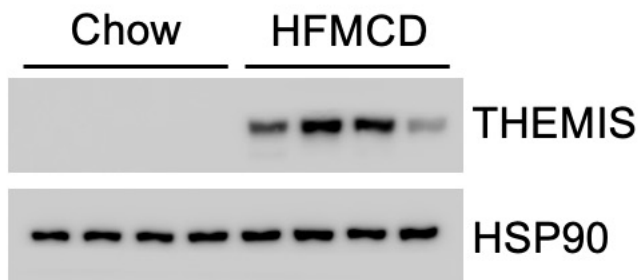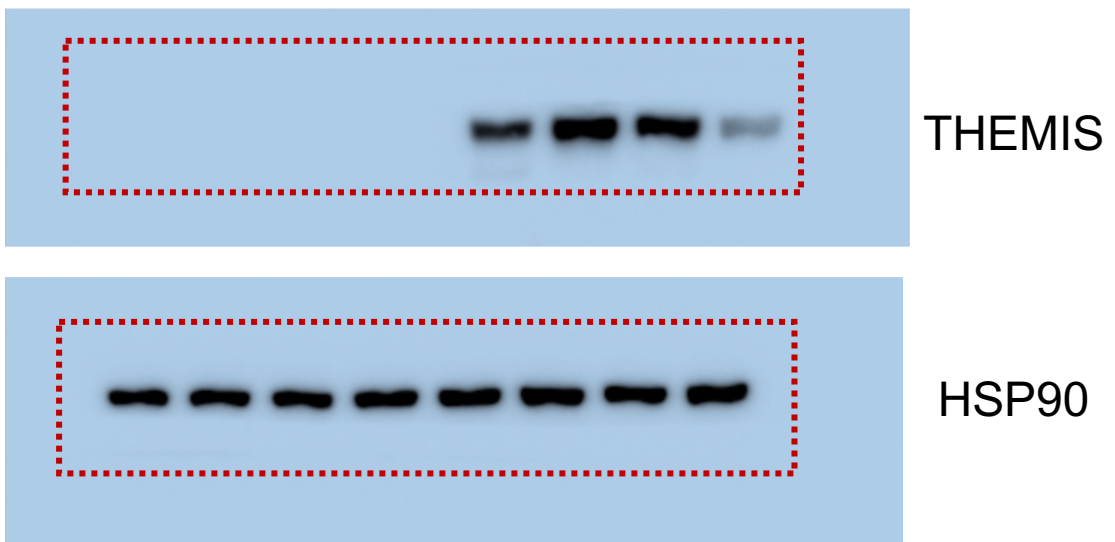

Figure 2J

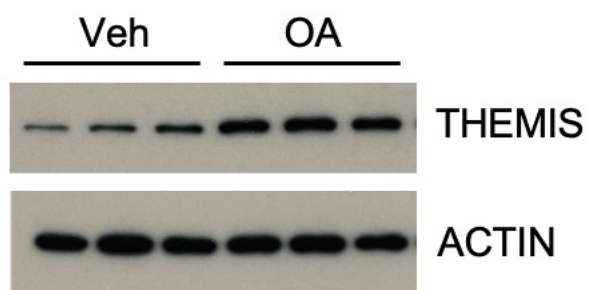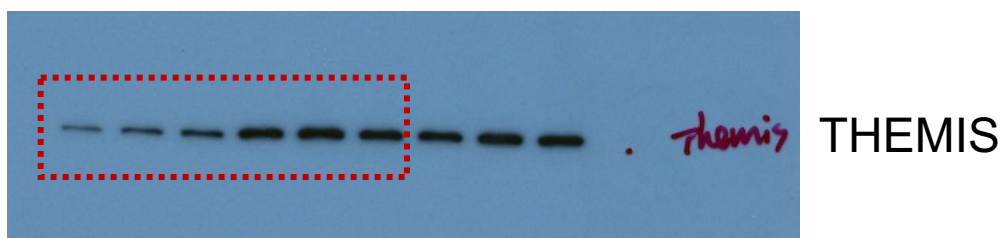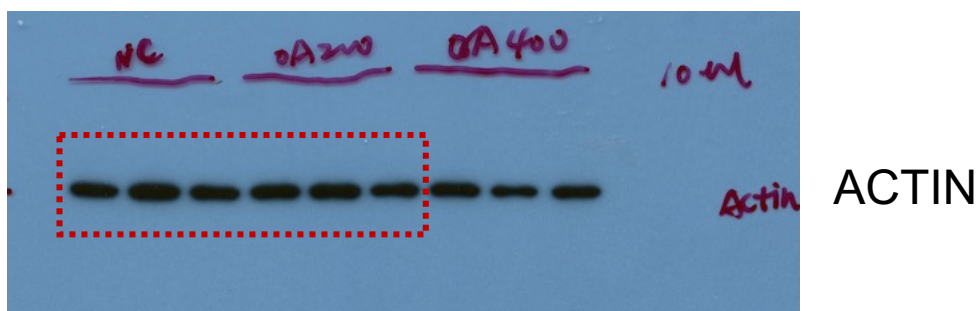

**Figure 3H**

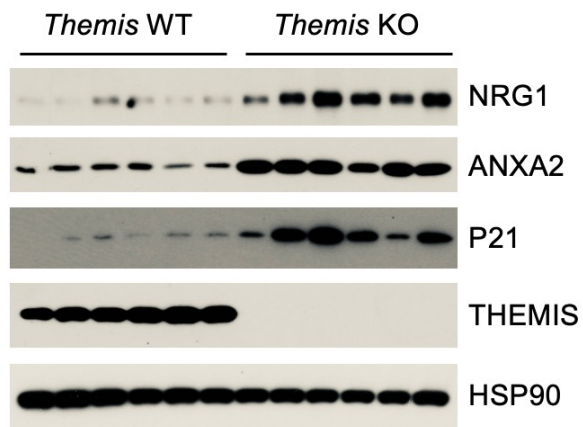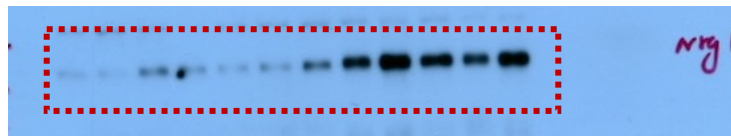

NRG1

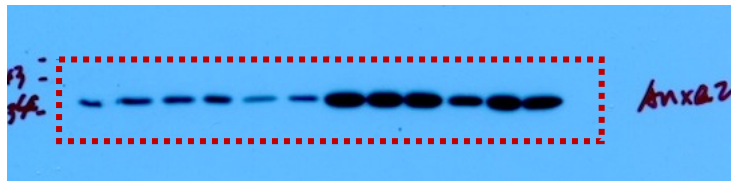

ANXA2

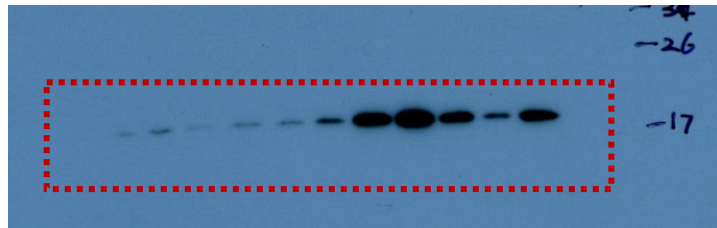

P21

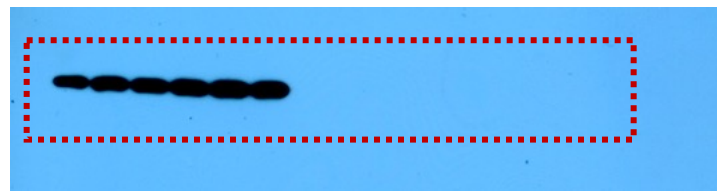

THEMIS

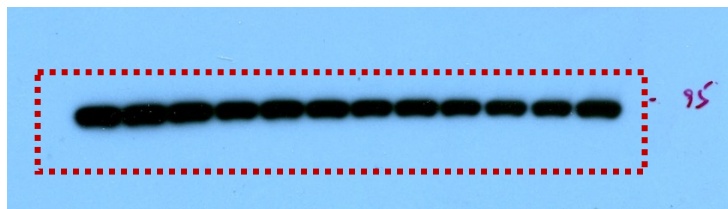

HSP90

**Figure 4F**

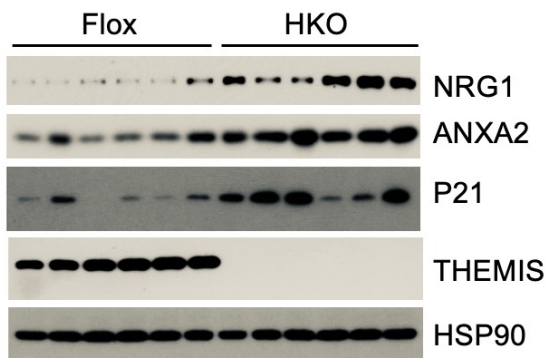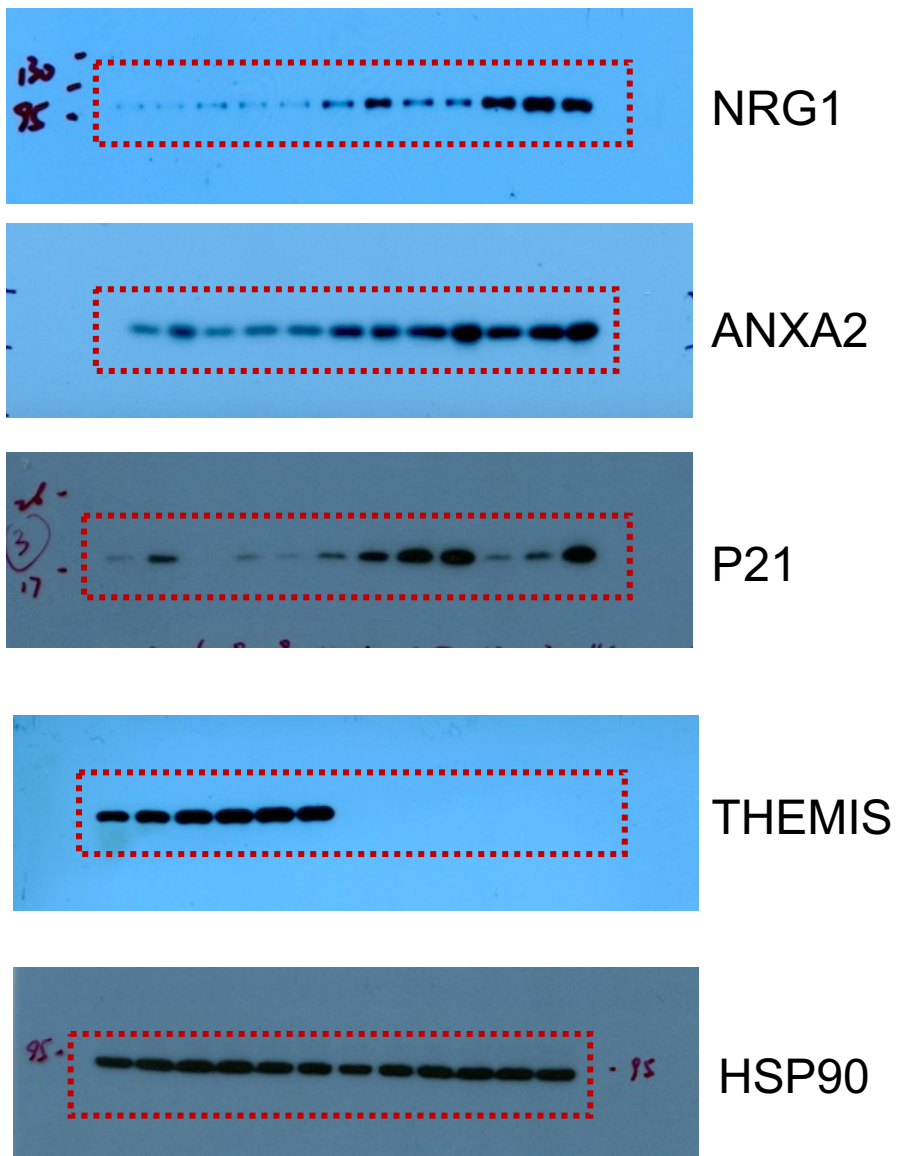

Figure 6A

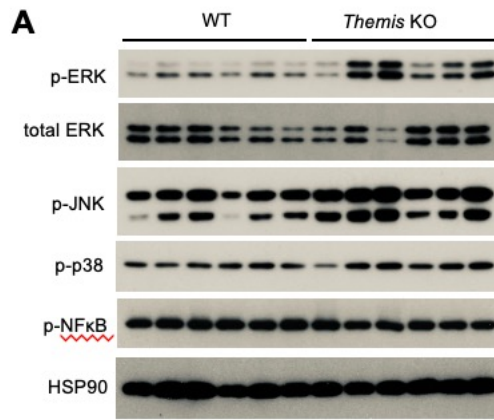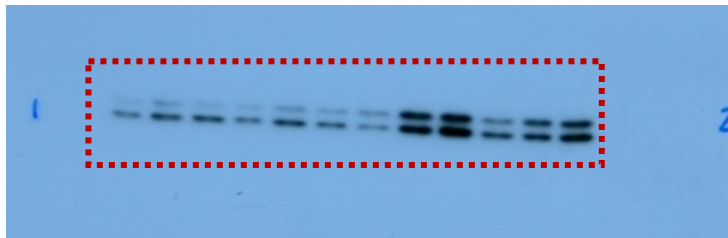

p-ERK

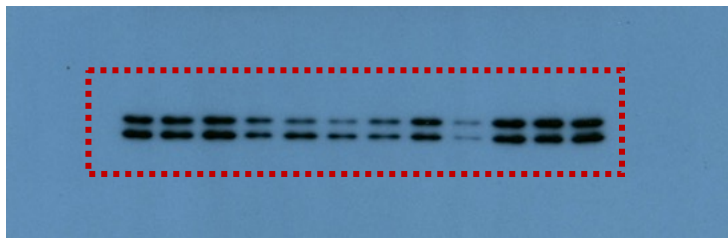

total-ERK

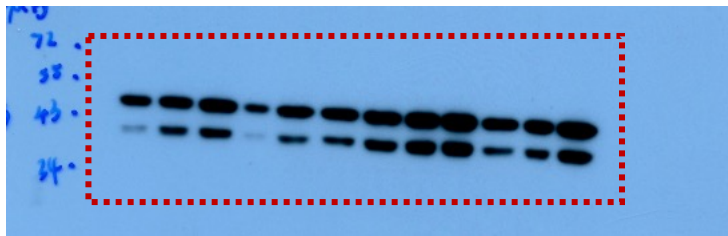

p-JNK

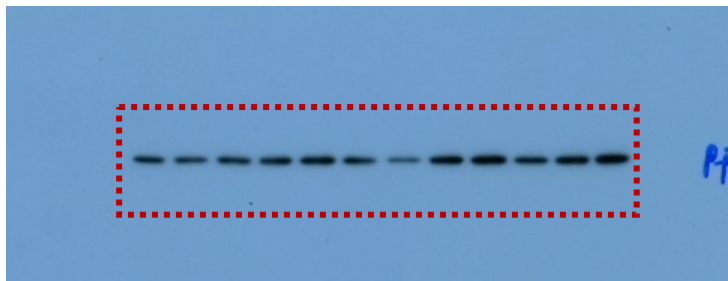

p-p38

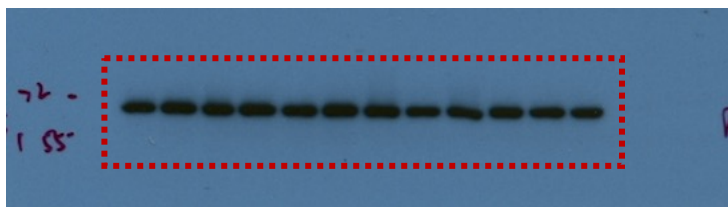

p-NFκB

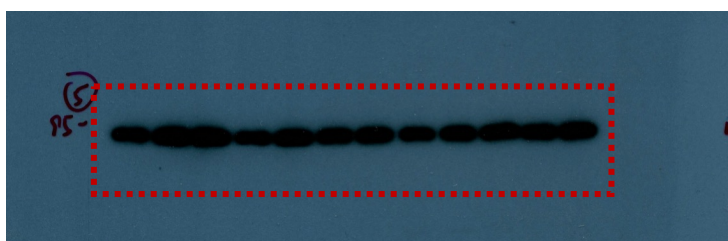

HSP90

Figure 6B

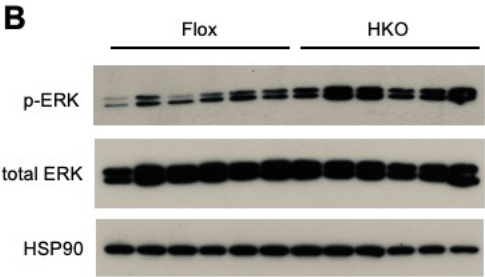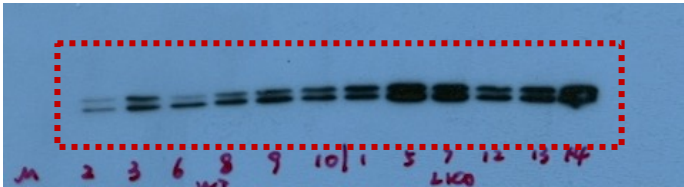

p-ERK

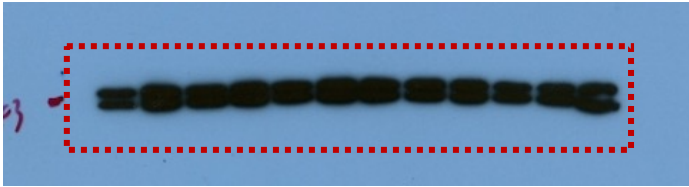

total-ERK

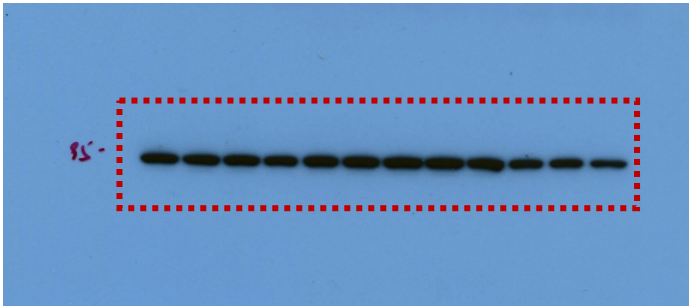

HSP90

**Figure 6C**

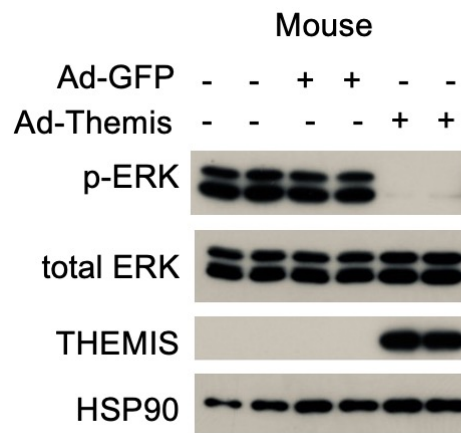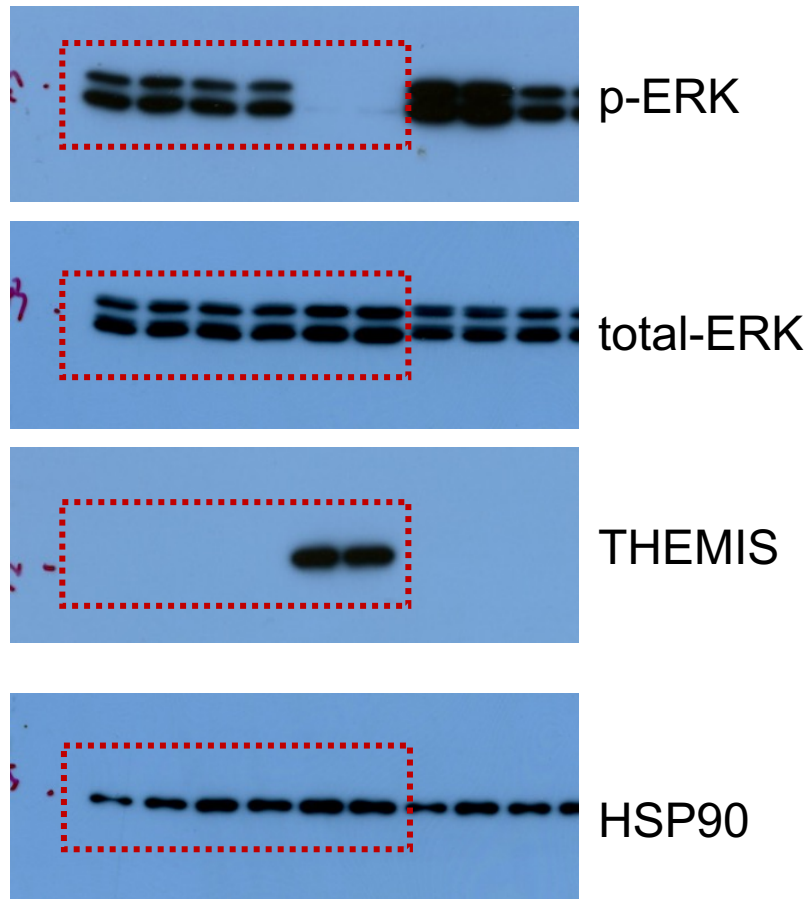

**Figure 6C**  
**continued**

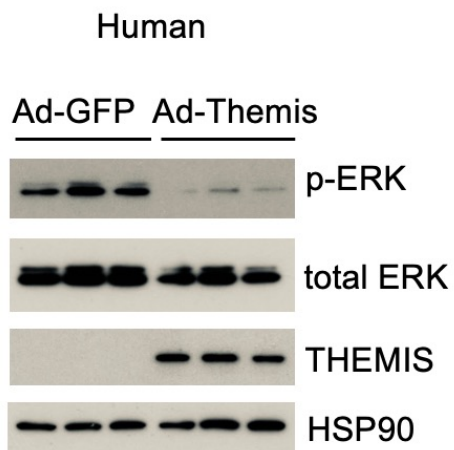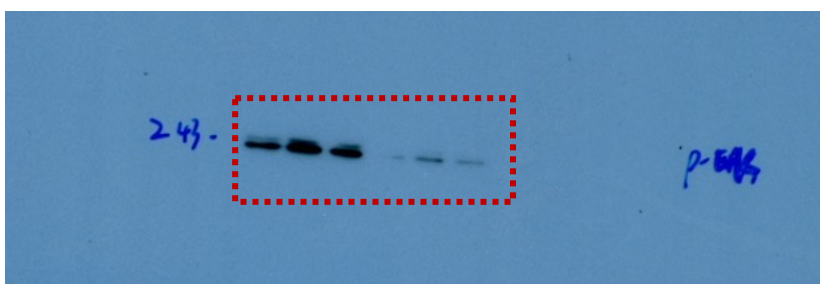

p-ERK

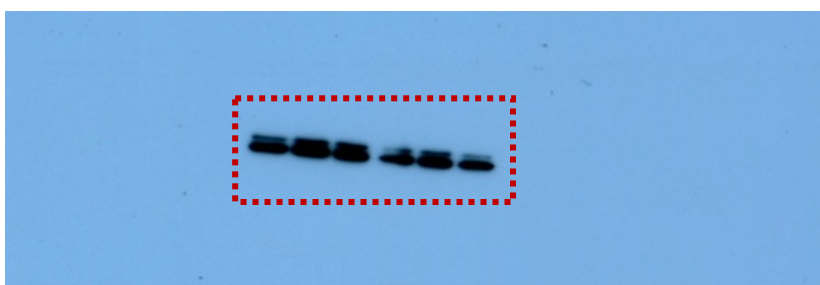

total-ERK

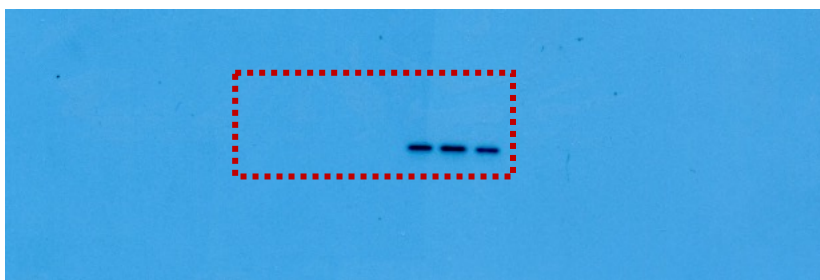

THEMIS

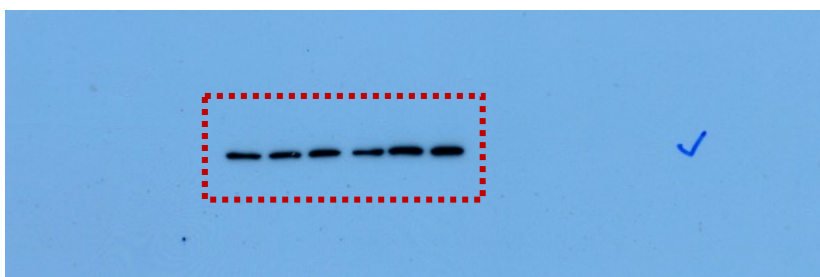

HSP90

**Figure 6D**

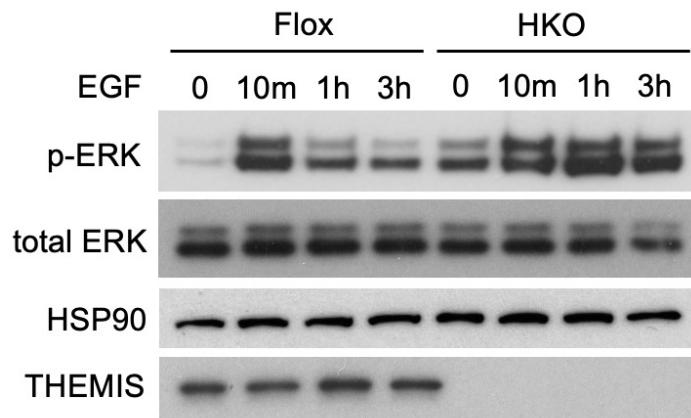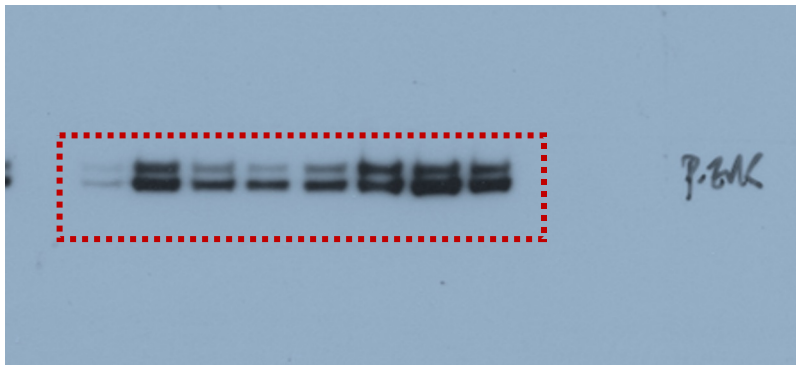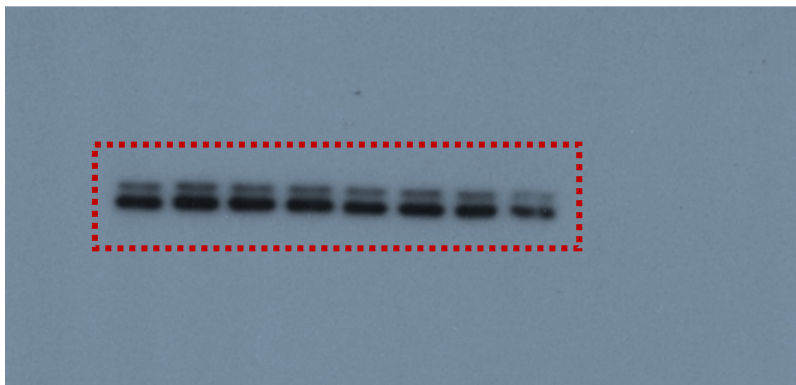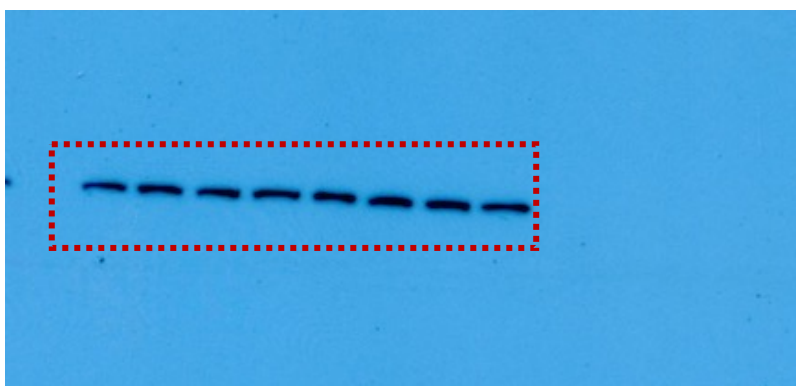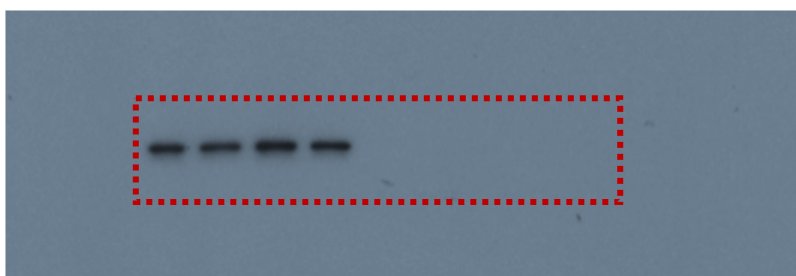

**Figure 6E**

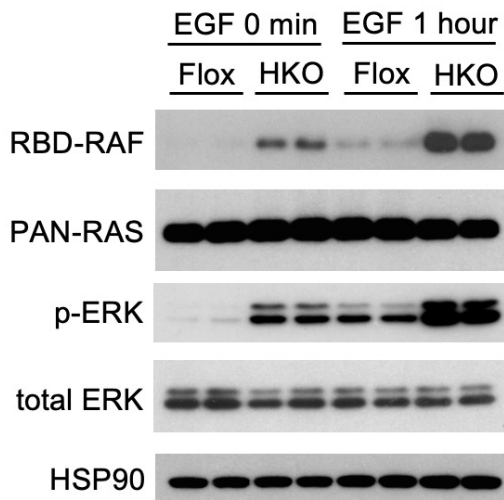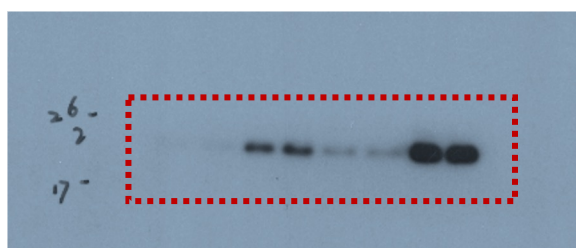

RBD-RAF

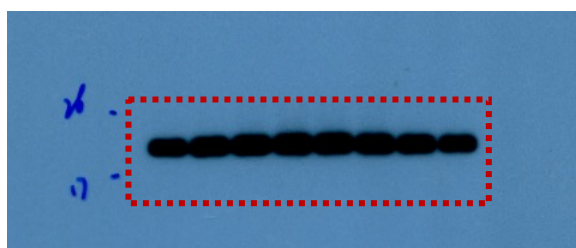

PAN-RAS

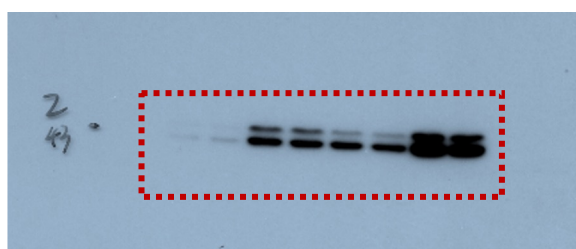

p-ERK

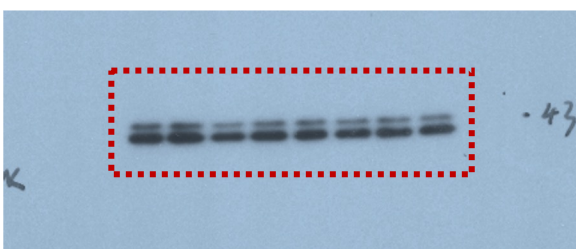

Total-ERK

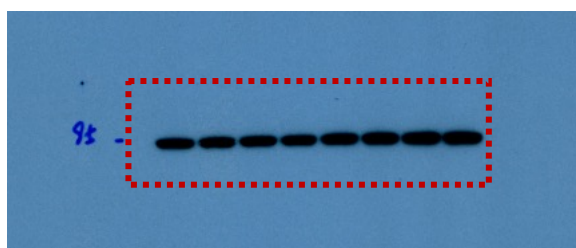

HSP90

**Figure 6G**

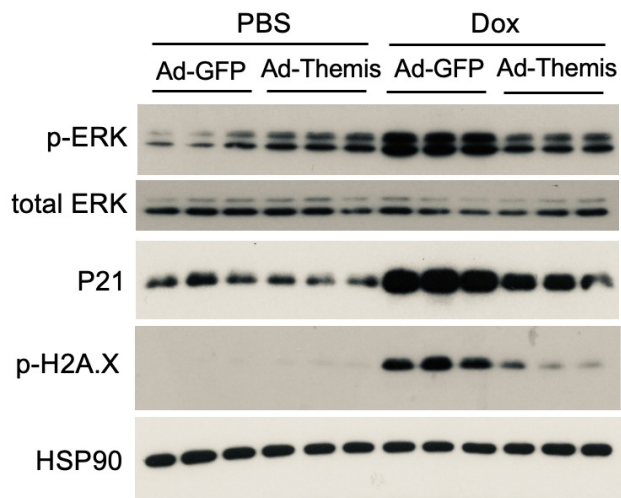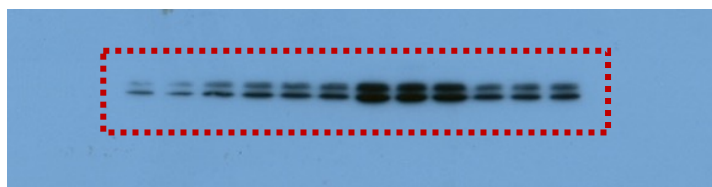

p-ERK

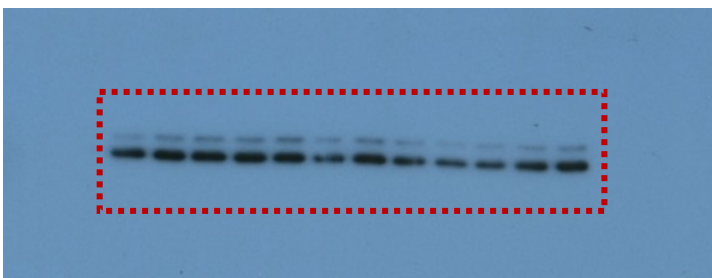

total-ERK

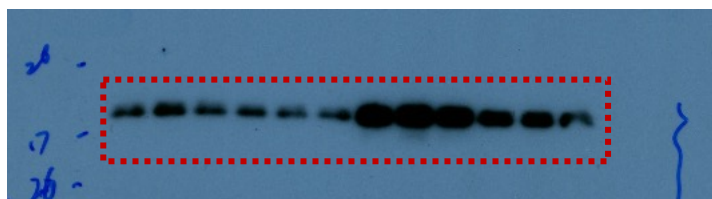

P21

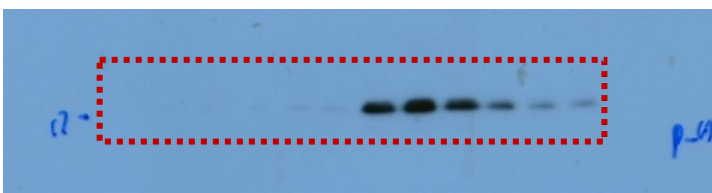

p-H2A.X

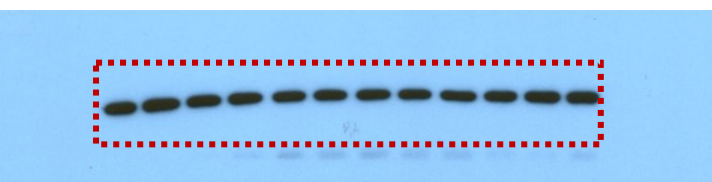

HSP90

**Figure 6H**

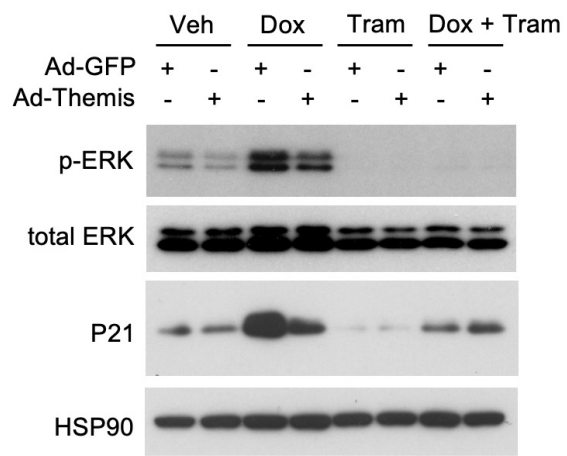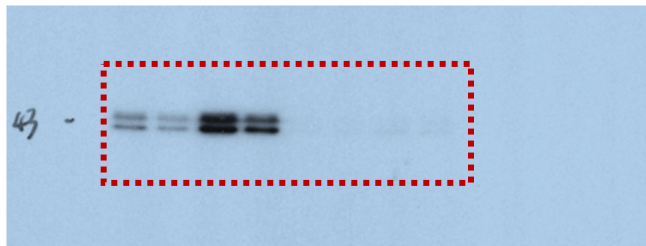

p-ERK

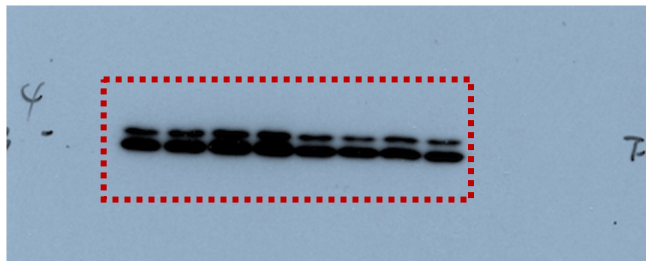

Total-ERK

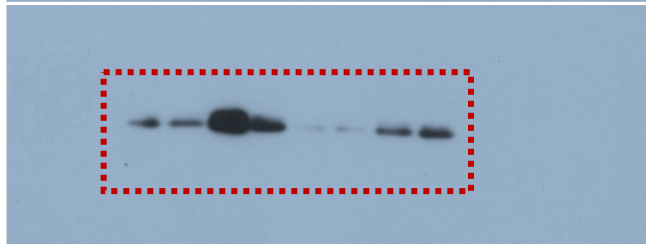

P21

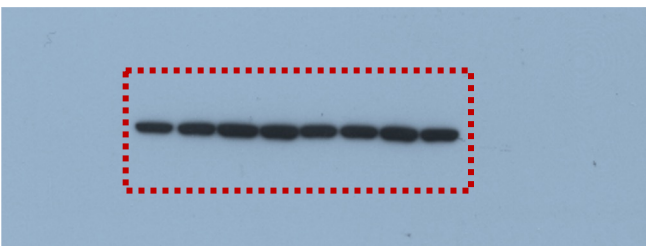

HSP90

**Figure 7E**

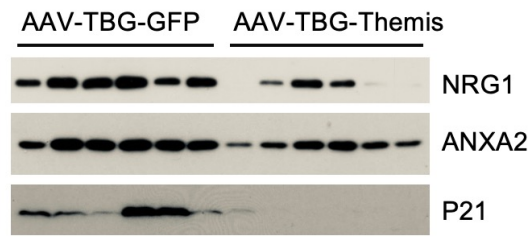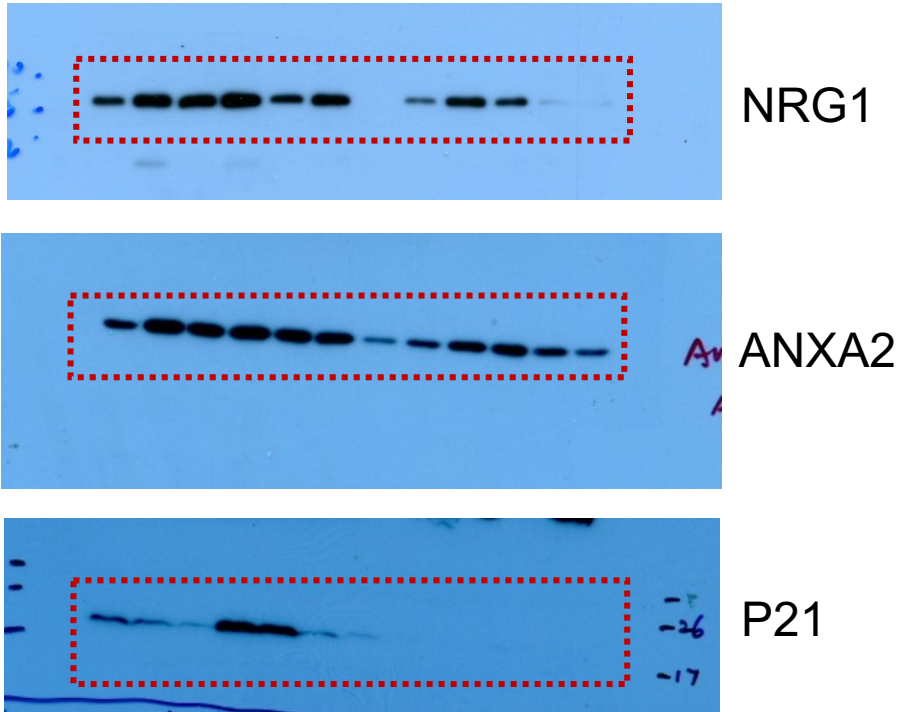

# Figure 7E continued

AAV-TBG-GFP    AAV-TBG-Themis

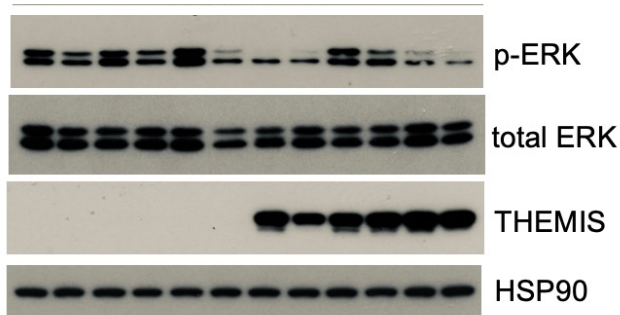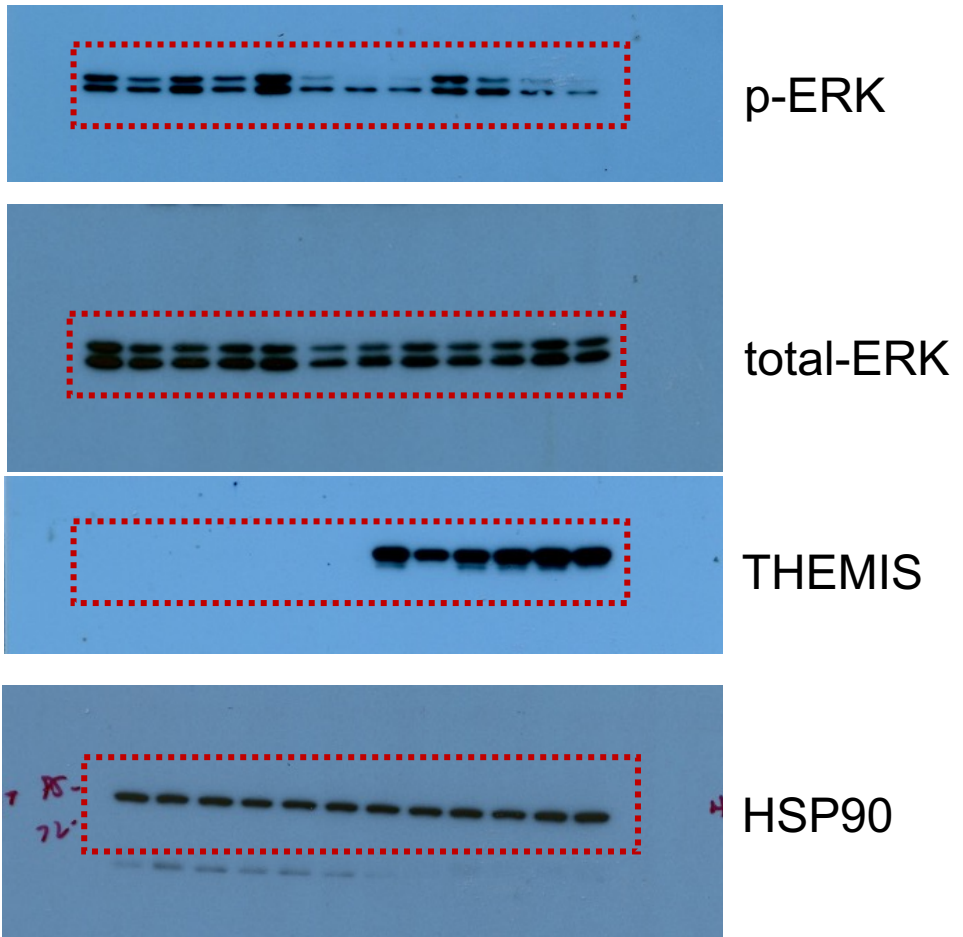

**Figure 8G**

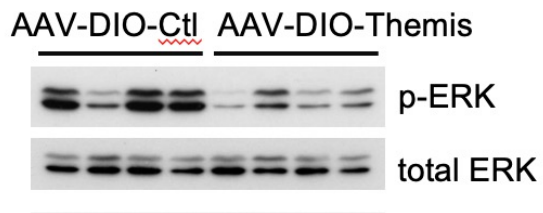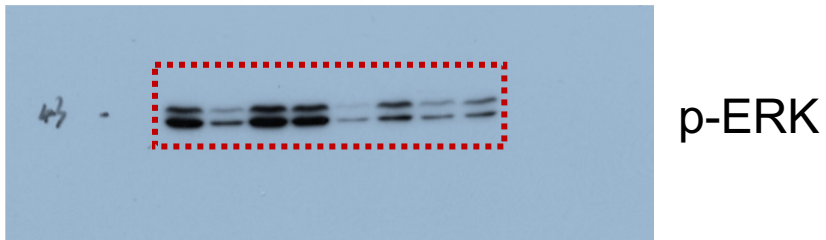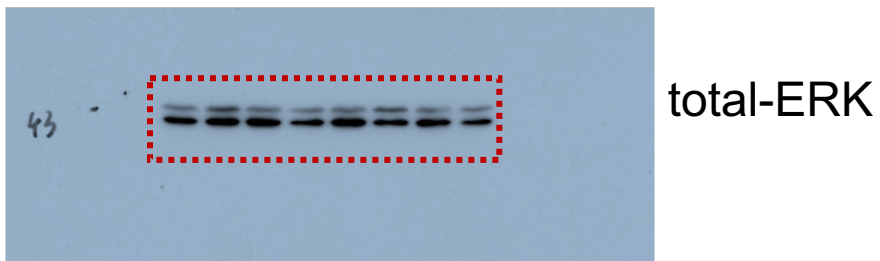

# Figure 8G continued

AAV-DIO-Ctl   AAV-DIO-Themis

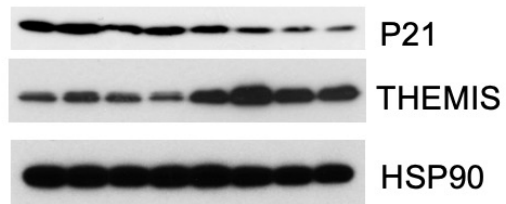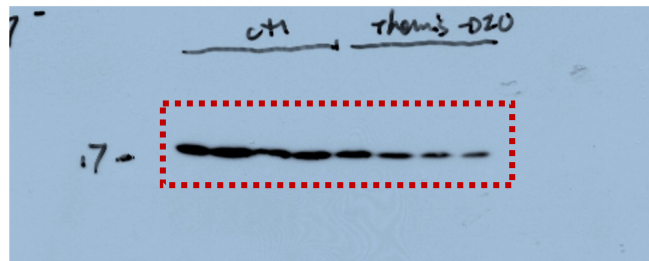

P21

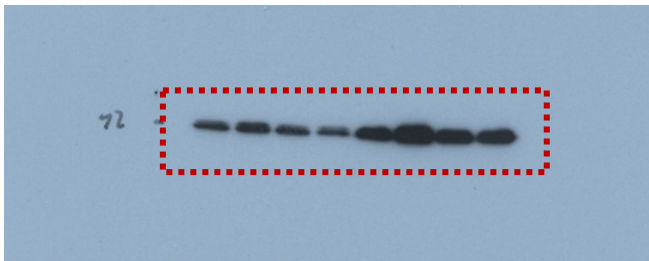

THEMIS

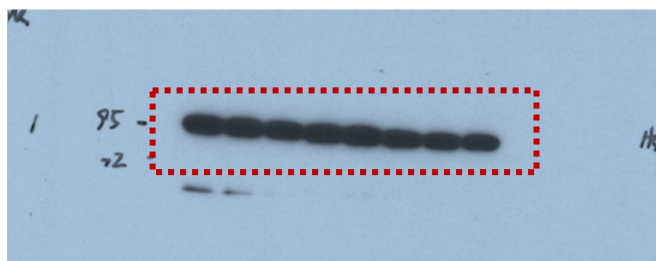

HSP90

# Supplementary Figure 9C

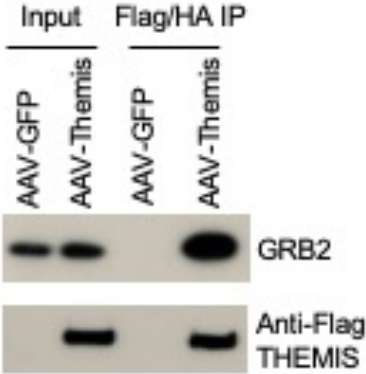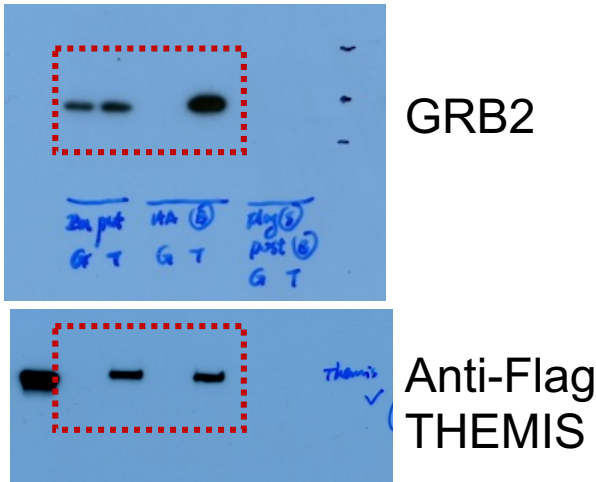

# Supplementary Figure 9D

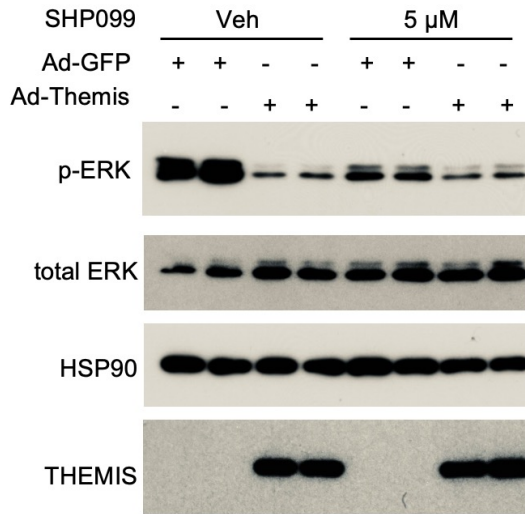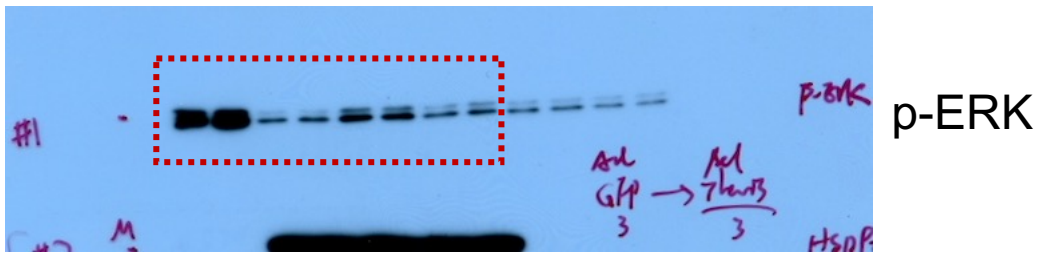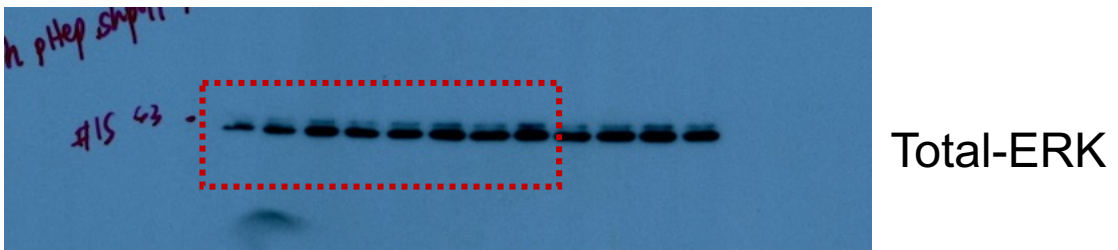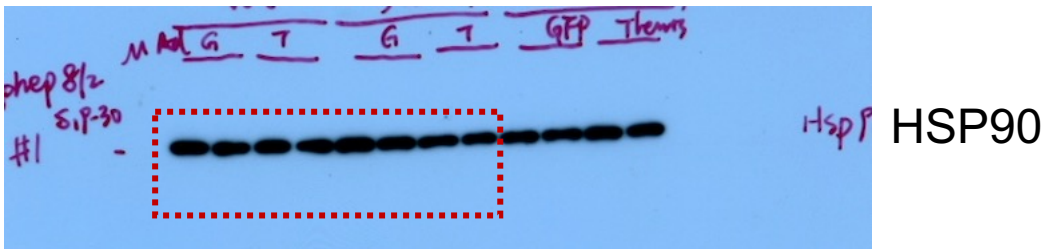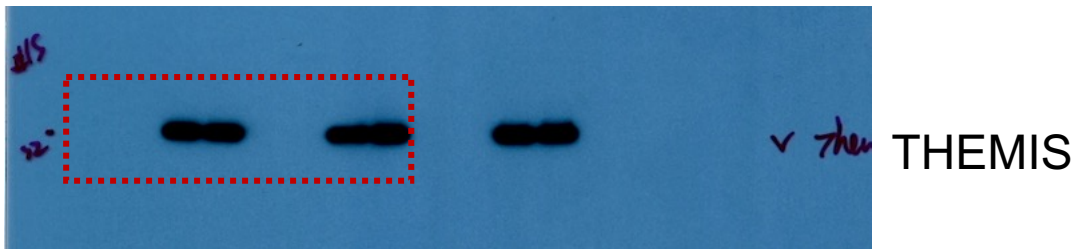

Supplement: sd2 [file 2]
